# Supplementary material for: CRISPR/Cas9 Allows Efficient and Complete Knock-In of a Destabilization Domain-Tagged Essential Protein in a Human Cell Line, Allowing Rapid Knockdown of Protein Function
Source: PubMed Central journal article supplement (PMC3990584; doi:10.1371/journal.pone.0095101), 2014-04-17
Supplement: pone.0095101.s001.pdf [file pone.0095101.s001.pdf]

The human genomic sequence flanking TCOF1 exon 1 is shown.

**Exon 1**

**TCOF1 start codon**

Genotyping primers

**Guide RNA sequence** (inserted into pX330)

...CCCTCATTTGTTCCCTCTTCCCCACCTCACCCACCCACCTGGACAGCCCAGCAGCG  
CAGACTAGGGGTCTGG**GTTTAGGGTTCCAGGCAAT**AGCAGGGTGTCTTCTCATGCCT  
AGACTCATGCAGTGCCCTCTGCCAGTCCCTCCTTTGCACCCAGCAATTTTCGGGTGTCT  
TTATGCCTCAGCTTAGATATCTCTCTGGGGTTCGGTGTCTCCTCCTTGGGGCGCCATAG  
GCTGCATCTGTCCCTGACAAGGCACACAAGATATTGAACTATAGTTGCTTGGTTACGGA  
CAGTCGTCTCTGTGAGCTTTGAGGGCAACTGCCATGTATTATGCATCTTTTGAATCCCC  
CTAGCCTAGCCGGGTGCTAGCCCAAGTTAGGTGCTTATTACAGATTTGTTTCAGTTAGCG  
AATGAATCAATGAATAAACTGGCAATTCGTGTCTGGTTCATGGGCACCAAAAACCGTGC  
GAAATGGATAAATGAGCAGGTAATGGCAGTACAAAGTTCGGATCTAGAGAAAGATCCAG  
ATTAGGGAGTTTCAGAGATGAGTAAACGCAGACCCAGCCATCAGAGAATTAACAAGGAA  
GATAAATCTCTTCAAGAAGCCAGCCGGAAGGATTAAGAGAGAGTCGTCCAAGTCCCGGC  
CGGCCCCGGGGGCGGGTCCCTGTCTAGCCCCGCATGCTCCGCGCCAATGGGCGGTATTG  
TTGATCACGAGTCTCCGCCCCCTTCGCCTTGAGGGGCGGGGCCGCCACTCCCGGAGAG  
GGACTACGTTTCCCGGCGCGCCGCGCGGCCGAGC**GAAAGAGGAGCCGGAAGTGGG**  
**GCGCGGAGGTCTAAGGGCGCGAGGGAAGTGGCGGGCGGGGACTAAGGCGGG**  
**GCGTGCAGGTAGCCGGCCGGCCGGGGTTCGCGGGT**ATG**GCCGAGGCCAGGAA**  
**GCGGCGGGAGCTACTTCCCCT**GATCTACCACCATCTGCTG**CGGGCTGGCTAT**  
**GTGCGTGCGGCGCGGGAAGTGAAGGAGCAGAGCGGCCAG**GTAAGCGTTTCGTGGG  
CCGTGTGCGAGGGCCGCGTGCAAGATGTGGAGATCAGCGGCCCGCGGCCCGCGCCCCGT  
CCCCAGGCGACCCGGCAGGCGCCCGGAGCCGGGTCCCGCAGTGTCTCGACGGCGGGCCA  
GGGTACCGGAGGAGCCGCAATCTCTGCCTTCCCACTGCGACTTCAGTTCCCCTGGGCC  
TCACTTTCCTCATCCGGGCAGTGGGTTGGGCCAGAAAGTGTGCTCGCAGGGGCCGA  
TTGTAATTCCCGCTTCCCTTACCTCCACGCCCTTCCCTGGTAGCGGGTATTTTAAGTTTC  
CTAAGTCTCCCGCCACGTGGCTAGGCTCTGCGCGGCCCCCCCTGGGGCAAGGAGTTGC  
TGCAGTCTCGGGGGTGGATTGCGACCAGCCCCTCGGGGGAGCGCCTGGAAAAGGGACC  
CTACAGCCTCTTAGTTGAGCTGGAAGTCAAGCCTTTAGCGATTGTCTGTACTGAGACGG  
TCAGCTTTGGTACTCGAACTCGTGGTACAGTCATTTCTTACTTGATTAATTCAACTGTT  
AATCCGGTACTCAGGGTGTCTCCTGGTGTTCGAATGGTGAGCACCATCTCTCAGCCCTC  
CTGGAGCTTACACTCTAGTAAGGTAGACAAATCAAAGAATCACAAAAGTGACTATATGC  
TTAGCACCGCAATAAGTGTTAAGAATGAGAGGGATGGGCCGGGCACGGTAGCTCACGCC  
TGTAATCCAGCACTTAGGGAGGCCGAGACTAGCGGATCACCTGAGGTCAGAAGTTCGA  
GACCAGCTGGCCAACATGGTGAAACACCGTTTCTACTAAAAATACAAAATTAGCTGG  
GCATGTTGGCGCACGCCTGTAATCCTGGCTACTCATGTGGCTGAGGCACAAGAATTGCT  
TGAACCCGGGAGGCAGAGGTTGCAATGAGTCAAGATCGTGCCACTGCACTCCAGCCTGG  
GCGATAAAGCGAGACTCTGCCTCAAAAAAAAAAGAGAGATGGATGGCAGATTGCCCTGG  
TCAGGAATAGCTGAGGTGTAATGCCTTGTGGTGGGAGGGAACCTGTGTACACACTGGC  
CTGGAGAAAGTCCACTCTCTTGAGCCAGGAATTTGAGGATACAGTATGAGCCATGATC  
ATGCCACTGCACTCCAGCCTGGGCAACAGAGCAAGACACTGTCTCAAAAAAAAAATTTTT  
TTAAGTCCATAGCAGGCCAGGTACGGTAGCTCACGCCGTGAATCCAGCACTTTGGGA  
GGCCGAGGCAGGCGGATCACTTGAGGCCAG...
