# Supplementary material for: CRISPR/Cas9 Allows Efficient and Complete Knock-In of a Destabilization Domain-Tagged Essential Protein in a Human Cell Line, Allowing Rapid Knockdown of Protein Function
Source: PubMed Central journal article supplement (PMC3990584; doi:10.1371/journal.pone.0095101), 2014-04-17
Supplement: pone.0095101.s002.pdf [file pone.0095101.s002.pdf]

The following donor insert was inserted into the PCR2.1 vector (Invitrogen).

**BamHI and EcoRI restriction sites**

Homology arms (all underlined sequence, regardless of color)

**TCOF1 exon 1**

Puromycin resistance (alternative Blast<sup>R</sup> is below)

GSG linker

P2A ribosomal skipping sequence

Destabilization domain

3XGGGS linker

**TCOF1 start codon**

**GGATCC**

CAGCAATTCGGGTGTCTTTATGCCTCAGCTTAGATATCTCTCTGGGGTTCGGTGCTCC  
TCCTTGGGGCGCCCATAGGCTGCATCTGTCCCTGACAAGGCACACAAGATATTGAACTA  
TAGTTGCTTGGTTACGGACAGTCGTCTGTGAGCTTTGAGGGCAACTGCCATGTATTA  
TGCATCTTTTGAATCCCCCTAGCCTAGCCGGGTGCTAGCCCAAGTTAGGTGCTTATTAC  
AGATTTGTTTCAGTTAGCGAATGAATCAATGAATAAACTGGCAATTCGTGTCTGGTTCAT  
GGGCACCAAAAACCGTGCGAAATGGATAAATGAGCAGGTAATGGCAGTACAAAAGTTCGG  
ATCTAGAGAAAGATCCAGATTAGGGAGTTCAGAGATGAGTAAAACGCAGACCCAGCCAT  
CAGAGAATTAACAAGGAAGATAAATCTCTTCAAGAAGCCAGCCGGAAGGATTAAGAGAG  
AGTCGTCCAAGTCCCGGCCGGCCCCGGGGGCGGGTCCCTGTCTAGCCCCGCATGCTCCG  
CGCCAATGGGCGGTATTGTTGATCACGAGTCTCCGCCCCCTTCGCCTTGAGGGCGGGG  
CCGGCCACTCCCGGAGAGGGGACTACGTTTCCCGCGCGCCGCGCGGCCGGAGC**GAAAG**  
**AGGAGCCGGAAGTGGGGCGCGGAGGCTTAAGGGCGCGAGGGAAGTGGCGGGCGGGGAC**  
**TAAGCGGGGCGGTGCAGGTAGCCGGCCGGCCGGGGGTTCGCGGGT**

ATGACCGAGTACAAGCCCACGGTGCGCCCTCGCCACCCGCGACGACGTCCCCAGGGCCGT  
ACGCACCCCTCGCCGCCGCGTTCGCCGACTACCCCGCCACGCGCCACACCGTCGATCCGG  
ACCGCCACATCGAGCGGGTCACCGAGCTGCAAGAACTCTTCCTCACGCGCGTCGGGCTC  
GACATCGGCAAGGTGTGGGTTCGCGGACGACGGCGCCGCGGTGGCGGTCTGGACCACGCC  
GGAGAGCGTCGAAGCGGGGGCGGTGTTTCGCCGAGATCGGCCCGCGCATGGCCGAGTTGA  
GCGGTTCCCGGCTGGCCGCGCAGCAACAGATGGAAGGCCTCCTGGCGCCGCACCGGCC  
AAGGAGCCCGCGTGGTTCCTGGCCACCGTCGGCGTCTCGCCCGACCACCAGGGCAAGGG  
TCTGGGCAGCGCCGTGCTGCTCCCCGGAGTGGAGGCGGCCGAGCGCGCCGGGGTGCCCC  
CCTTCCTGGAGACCTCCGCGCCCCGCAACCTCCCCTTCTACGAGCGGCTCGGCTTCACC  
GTCACCGCCGACGTCGAGGTGCCGAAGGACCGCGCACCTGGTGCATGACCCGCAAGCC  
CGGTGCC

GGATCCGGA

GCCACGAACTTCTCTCTGTTAAAGCAAGCAGGAGACGTGGAAGAAAACCCCGTCCC

ATGGGAGTGCAGGTGGAAACCATCTCCCCAGGAGACGGGCGCACCTTCCCCAAGCGCGG  
CCAGACCTGTGTGGTGCACCTACACCGGGATGCTTGAAGATGGAAAGAAAGTCGATTCTT  
CCCGGGACAGAAACAAGCCCTTTAAGTTTATGCTAGGCAAGCAGGAGGTGATCCGAGGC  
TGGGAAGAAGGGGTTGCCAGATGAGTGTGGGTTCAGAGAGCCAAACTGACTATATCTCC  
AGATTATGCCTATGGTGCCACTGGGCACCCAGGCATCATCCACCACATGCCACTCTCG  
TCTTCGATGTGGAGCTTCTAAAACCGGAA

GGT GGA GGT GGA TCT GGT GGA GGT GGA TCT GGT GGC GGC GGT TCA  
**ATG**GCCGAGGCCAGGAAGCGGCGGGAGCTACTTCCCCTGATCTACCACCATCTGCTGCG  
**GGCTGGCTATGTGCGTTCGGCGCGGGAAGTGAAGGAGCAGAGCGGCCAG**GTAAGCGTTC  
GTGGGCCGTGTGCGAGGGCCGCGTGCAAGATGTGGAGATCAGCGGCCCGCGGCCCGCGC  
CCCGTCCCCAGGCGACCCGGCAGGCGCCCGGAGCCGGGTCCCAGTGCTCGACGGCGC  
GGCCAGGGGTACCGGAGGAGCCGCAATCTCTGCCTTCCCAGTGCAGTTCAGTTCCCCT  
GGCCTCACTTTCCTCATCCGGGCAGTGGGTTGGGCCAGAAAGTGTGCTCGCAGGGGCC  
GAACTTTGTAATTCCCGCTTCCCTTACCTCCACGCCCTTCCCTGGTAGCGGGTATTTTAA  
GTTTCCTAAGTCTCCCGCCACGTGGCTAGGCTCTGCGCGGCCCCCCCTGGGGCAAGGAG  
GTTGCTGCGAGTCTCGGGGGTGGATTGCGACCAGCCCTCGGGGGAGCGCCTGGAAAAG  
GGACCCTACAGCCTCTTAGTTGAGCTGGAAGTACAGGCCCTTAGCGATTGTCTGTACTGA  
GACGGTCAGCTTTGGTACTCGAACTCGTGGTACAGTCATTTCTTACTTGATTAATTCAA  
CTGTTAATCCGGTACTCAGGGTGCTTCCCTGGTGTTTGAATGGTGAGCACCATCTCTCAG  
CCCTCCTGGAGCTTACACTCTAGTAAGGTAGACAAATCAAAGAATCACAAAAGTGACTA  
TATGCTTAGCACCGCAATAAGGGCCGGCCAAAAGGGC  
**GAATTC**

Blasticidin resistance:

ATGGCCAAGCCTTTGTCTCAAGAAGAATCCACCCTCATTTGAAAGAGCAACGGCTACAAT  
CAACAGCATCCCCATCTCTGAAGACTACAGCGTCGCCAGCGCAGCTCTCTCTAGCGACG  
GCCGCATCTTCACTGGTGTCAATGTATATCATTTTACTGGGGGACCTTGTGCAGAACTC  
GTGGTGCTGGGCACTGCTGCTGCTGCGGCAGCTGGCAACCTGACTTGTATCGTCGCGAT  
CGGAAATGAGAACAGGGGCATCTTGAAGCCCTGCGGACGGTGCCGACAGGTGCTTCTCG  
ATCTGCATCCTGGGATCAAAGCCATAGTGAAGGACAGTGATGGACAGCCGACGGCAGTT  
GGGATTCGTGAATTGCTGCCCTCTGGTTATGTGTGGGAGGGC
